# Supplementary material
Source: publisher figshare collection journal article supplement (https://gsajournals.figshare.com/ndownloader/files/14218925)
Supplement: Supplementary file 1 [file 14218925]

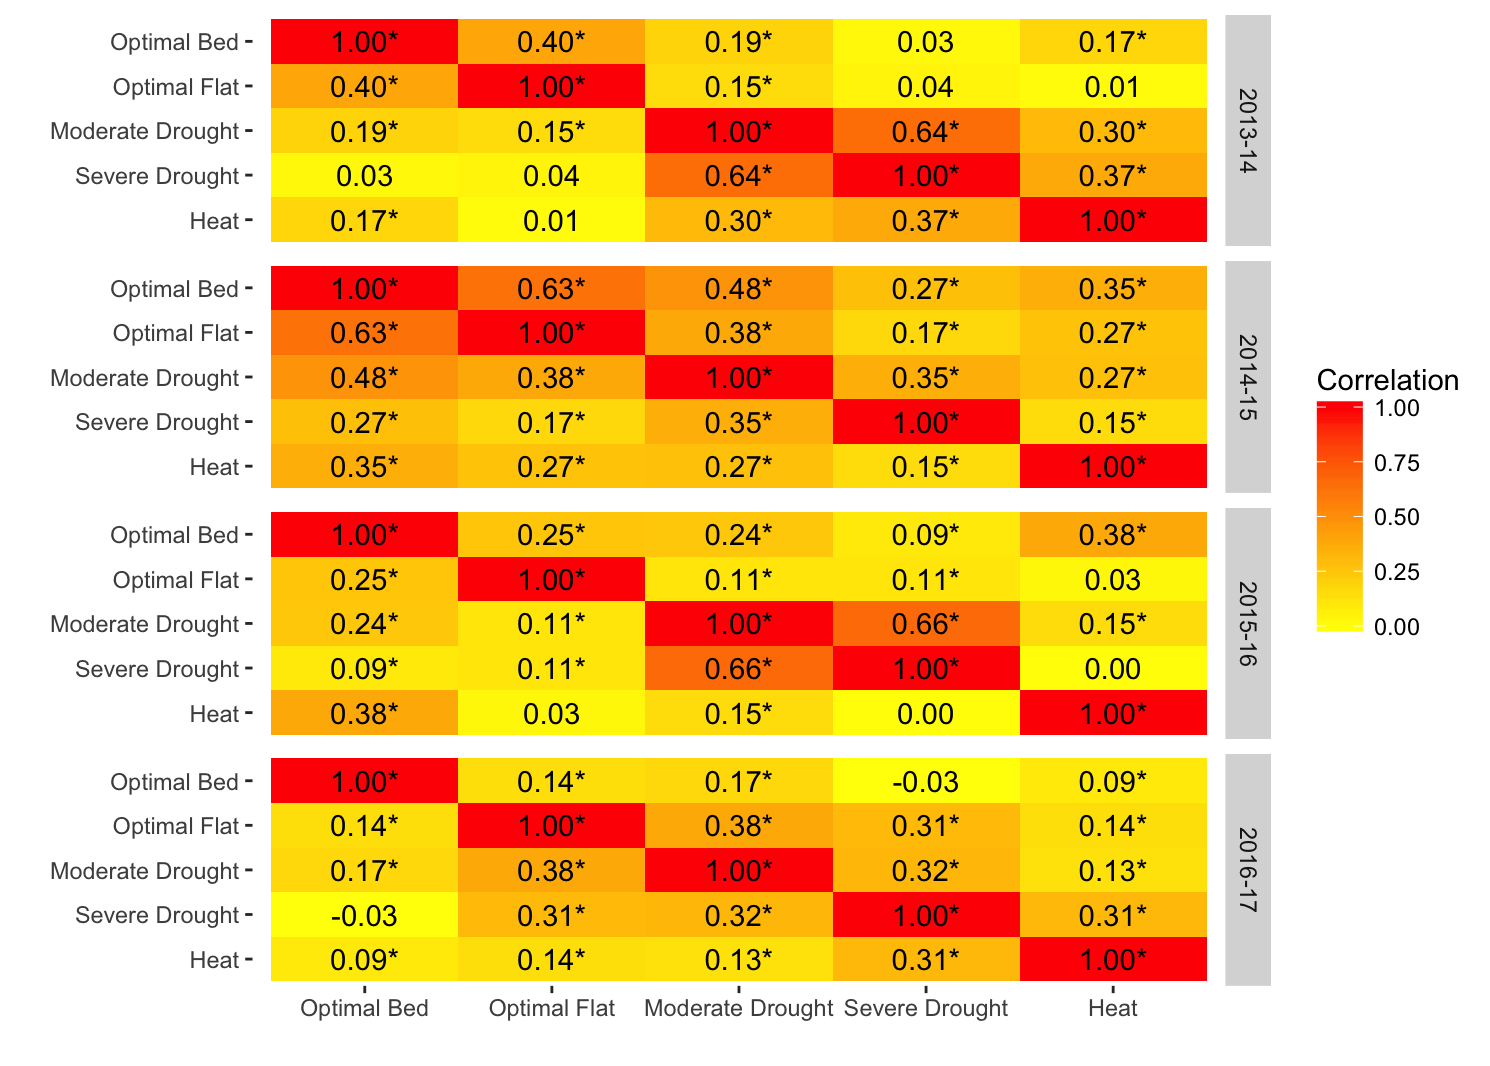


**FIGURE S1** Correlations for grain yield between managed treatments within breeding cycles

For each breeding cycle, the correlations for grain yield between managed treatments are reported. Strong and weak correlations are shown in shades of red and yellow, respectively. Intermediate correlations are shaded in orange. * denotes significance at a level of 0.05.
